# Supplementary material for: Consistent left-right asymmetry cannot be established by late organizers inXenopusunless the late organizer is a conjoined twin
Source: Oxford University Press journal article supplement (doi:10.1242/dev.041798), 2010-03-09
Supplement: dev041798tables2.pdf [file dev041798tables2.pdf]

**Table S2. Percent of embryos with *Xnr-1* signal in each location, indicating that *Xnr-1* localization is often abnormal in conjoined twins**

| Induced axis | Left | Right     | Both      | Neither   | Middle | Middle +<br>Left | Middle +<br>Right | Middle +<br>Both | <i>Xnr-1</i> mislocalization in<br>either twin (%) |
|--------------|------|-----------|-----------|-----------|--------|------------------|-------------------|------------------|----------------------------------------------------|
| None         | 97   | 0         | <b>1</b>  | <b>2</b>  | 0      | 0                | 0                 | 0                | 3                                                  |
| Right        | 45   | <b>9</b>  | <b>11</b> | <b>27</b> | 0      | 5                | <b>2</b>          | 0                | 50*                                                |
| Left         | 27   | <b>15</b> | <b>17</b> | <b>17</b> | 12     | 5                | <b>5</b>          | <b>2</b>         | 56*                                                |

Fixed embryos were examined at stage 22 for the localization of a probe for *Xnr-1* mRNA. *Xnr-1* was localized predominantly on the left side of untreated singleton embryos. However, when twins were induced, either on the right or the left side, *Xnr-1* expression was mislocalized in 50 or 56% of embryos, respectively. This data correlates with organ situs, because we observed that the right sided twin has random organ placement approximately 50% of the time. Bolded values indicate abnormal localization. \*,  $P < 0.001$  compared to untreated controls.
